# Supplementary material
Source: Springer Nature journal article supplement (https://www.springermedizin.de/resource/supplementary/12891_2007_472_MOESM11_ESM.pdf/9511512)

# WOMAC

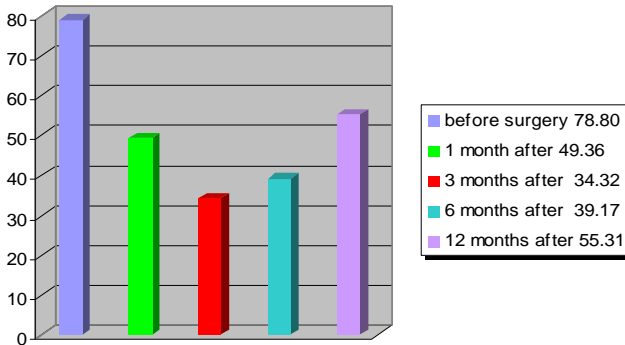

Supplement: MOESM11 [file 9511512]
